# Supplementary material
Source: MDPI journal article supplement (https://www.mdpi.com/2571-9408/4/3/88)
Supplement: s1 [file s1]

## Multi-Modal, Non-Invasive Investigation of Modern Colorants on Three Early Modern Prints by Maria Sibylla Merian

Olivia Dill<sup>1</sup>, Marc Vermeulen<sup>1</sup>, Alicia McGeachy<sup>1</sup> and Marc Walton<sup>1,\*</sup>

<sup>1</sup>Northwestern University, Art Institute of Chicago Center for Scientific Studies in the Arts

\*Correspondence: [marc.walton@northwestern.edu](mailto:marc.walton@northwestern.edu)

Table S1. Parameters for MA-XRF scans of each print

| Point    | Pixel Size | Dwell Time | Voltage | Current |
|----------|------------|------------|---------|---------|
| Plate 9  | 1.0 mm     | 0.2 s      | 40kV    | 1.250 A |
| Plate 54 | 0.8 mm     | 0.2s       | 40kV    | 1.250 A |
| Plate 55 | 0.8 mm     | 0.2 s      | 40 kV   | 1.250 A |

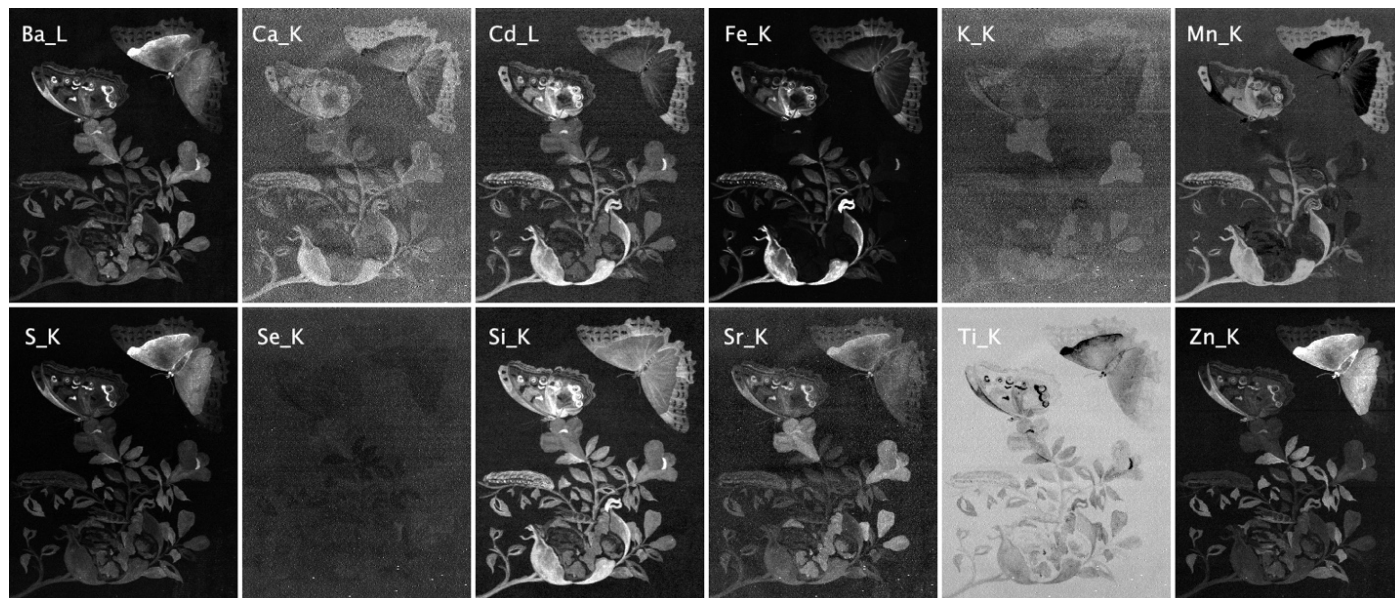

Figure S1. Elemental maps resulting from MA-XRF scan of plate 9.

Table S2. Results of XRF point analysis for plate 9. Elements marked with an asterisk are found in the mat. Those in italics are found in the paper. Elemental distributions suggest the use of cadmium-based yellow and reds, barium-rich red, Prussian blue, brown umber, lithopone, and iron oxide yellow.

| Point | Color       | Elements Present                                                                                                                                | Pigment identification                                                                                                |
|-------|-------------|-------------------------------------------------------------------------------------------------------------------------------------------------|-----------------------------------------------------------------------------------------------------------------------|
| 01    | Brown       | <i>Ca*</i> , <i>Ti*</i> , <i>K</i> , <i>As</i> , <i>Cu</i> , <i>Si</i> , <i>Ni</i><br>Fe, S, Zn, Mn, Ba, Cd                                     | Mat and/or paper<br>Umber (iron oxide + manganese oxide), lithopone (barium sulfate + zinc sulfide)                   |
| 02    | Light blue  | <i>Ca*</i> , <i>Fe*</i> , <i>K</i> , <i>As</i> , <i>Co</i> , <i>Si</i> , <i>Cu</i> ,<br><i>Mn</i> , <i>Ni</i> , <i>Ti*</i><br>Zn, S, Ba         | Mat and/or paper<br>Lithopone (barium sulfate + zinc sulfide), unidentified organic pigment?                          |
| 03    | Dark Blue   | <i>Ca*</i> , <i>Ti*</i> , <i>K</i> , <i>As</i> , <i>Co</i> , <i>Ba</i> , <i>Cu</i> ,<br><i>Ni</i> , <i>Mn</i> , <i>Si</i><br>Fe, Zn, S, Ba      | Paper and/or mat<br>Prussian blue<br>Organic pigments with lithopone substrate in mixture with Prussian blue          |
| 04    | Green       | <i>Ti*</i> , <i>Ca*</i> , <i>Fe*</i> , <i>K</i> , <i>As</i> , <i>Co</i> , <i>Cu</i> ,<br><i>Mn</i> , <i>Ni</i> , <i>Ba</i> , <i>Si</i><br>Zn, S | Mat and/or paper<br>Unidentified organic pigment, zinc sulfide and/or lithopone (barium sulfate + zinc sulfide)       |
| 05    | Green       | <i>Ca*</i> , <i>K</i> , <i>As</i> , <i>Co</i> , <i>Mn</i> , <i>Cu</i> ,<br><i>Si</i> , <i>Ni</i> , <i>Ti*</i><br>Fe, Zn, S, Ba                  | Mat and/or paper<br>Iron oxide and/or Prussian blue, lithopone (barium sulfate + zinc sulfide)                        |
| 06    | Yellow      | <i>K</i> , <i>Ca*</i> , <i>As</i> , <i>Sr</i> , <i>Mn</i> , <i>Cu</i> , <i>Ni</i> ,<br><i>Si</i> , <i>Ti*</i> ,<br>Fe, Ba, S, Cd, Zn            | Mat and/or paper<br>Iron oxide, lithopone (barium sulfate + zinc sulfide), cadmium-based pigment                      |
| 07    | Dark Red    | <i>Ca*</i> , <i>Fe*</i> , <i>K</i> , <i>As</i> , <i>Co</i> , <i>Mn</i> , <i>Cu</i> ,<br><i>Ti*</i> ,<br><i>Ni</i> , <i>Si</i> , Zn, S, Ba       | Mat and/or paper<br>Iron oxide, lithopone (barium sulfate + zinc sulfide),                                            |
| 08    | Mint Green  | <i>Ca*</i> , <i>Fe*</i> , <i>K</i> , <i>As</i> , <i>Co</i> , <i>Cu</i> , <i>Mn</i> ,<br><i>Ni</i> , <i>Si</i> , <i>Ti*</i><br>Zn, S, Ba         | Mat and/or paper<br>Unidentified organic pigment, lithopone (barium sulfate + zinc sulfide)                           |
| 09    | Red         | <i>Ca*</i> , <i>K</i> , <i>As</i> , <i>Cu</i> , <i>Si</i> , <i>Ni</i> , <i>Co?</i> ,<br><i>Ti*</i> ,<br>Fe, Ba, S, Zn, Mn                       | Mat and/or paper<br>Iron oxide and/or umber (iron oxide + manganese oxide), lithopone (barium sulfate + zinc sulfide) |
| 10    | Pink        | <i>Ca*</i> , <i>K</i> , <i>Fe*</i> , <i>As</i> , <i>Co</i> , <i>Cu</i> , <i>Zn</i> ,<br><i>Mn</i> , <i>Ni</i> , <i>Si</i><br><i>Ti</i> , S      | Mat and/or paper<br>Unidentified organic pigment, titanium white?                                                     |
| 11    | Dark Blue   | <i>K</i> , <i>As</i> , <i>Zn</i> , <i>Co</i> , <i>Cu</i> , <i>Mn</i> , <i>Ni</i> ,<br><i>Si</i> , <i>Ba</i> , <i>Ca*</i> , <i>Ti*</i><br>Fe, S  | Mat and/or paper<br>Prussian blue                                                                                     |
| 12    | Light Green | <i>Ca*</i> , <i>K</i> , <i>As</i> , <i>Co</i> , <i>Mn</i> , <i>Cu</i> , <i>Si</i> ,<br><i>Ni</i> , <i>Ti*</i><br>Zn, Fe, S, Ba                  | Mat and/or paper<br>Iron-oxide and/or Prussian blue, lithopone (barium sulfate + zinc sulfide)                        |
| 13    | Dark Green  | <i>Ca*</i> , <i>K</i> , <i>Co</i> , <i>Cu</i> , <i>As</i> , <i>Mn</i> , <i>Ni</i> ,<br><i>Si</i> , <i>Ti*</i> ,<br>Fe, Zn, S, Ba                | Mat and/or paper<br>Iron oxide and/or Prussian blue, lithopone (barium sulfate + zinc sulfide)                        |

|    |                         |                                                                        |                                                                                                                          |
|----|-------------------------|------------------------------------------------------------------------|--------------------------------------------------------------------------------------------------------------------------|
| 14 | Dark<br>Yellow<br>Green | <i>Ca, K, As, Mn, Cu, Si, Ni,</i><br><i>Ti*</i><br>Fe, Zn, S, Cd, Ba   | Mat and/or paper<br>Iron oxide and/or Prussian blue, lithopone (barium sulfate +<br>zinc sulfide), cadmium-based pigment |
| 15 | Red                     | <i>Ca*, K, Fe*, As, Co, Cu, Si,</i><br><i>Ni, Mn, Ti*</i><br>S, Ba, Cd | Mat and/or paper<br>Barium sulfate, cadmium-based pigment                                                                |
| 16 | Paper                   | <i>Ca, Ti, Fe, K, Co, As, Cu,</i><br><i>Mn, S, Ba, Si, Ni</i>          |                                                                                                                          |
| 17 | Mat                     | <i>Ca*, Ti*, Fe*</i>                                                   |                                                                                                                          |

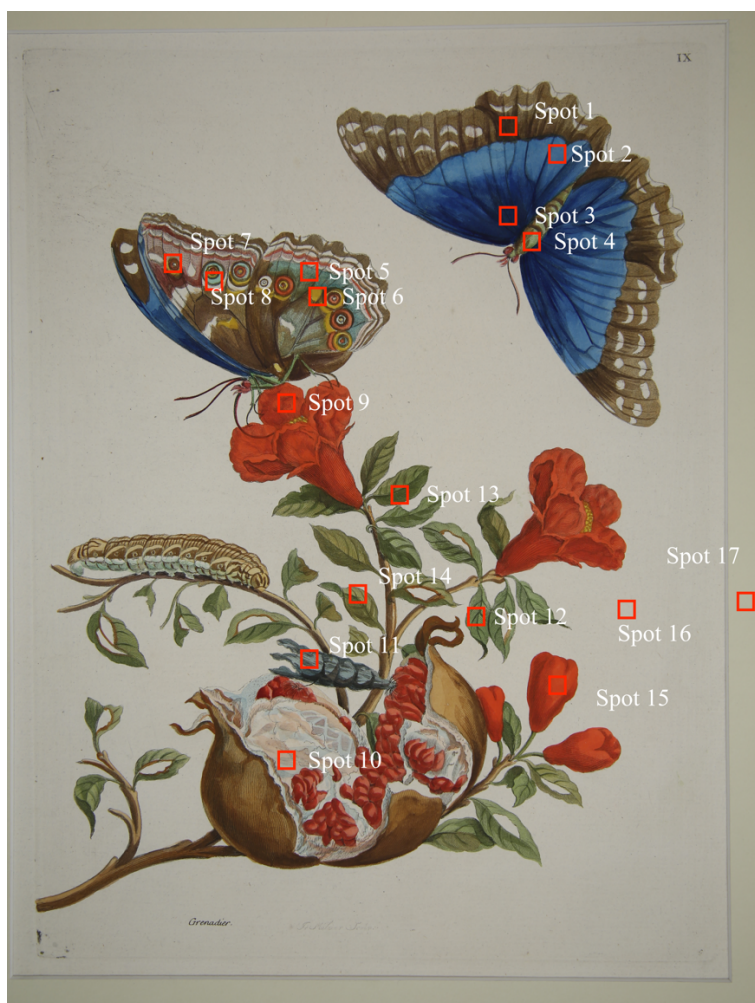

Figure S2. Sample locations for XRF point analysis of plate 9.



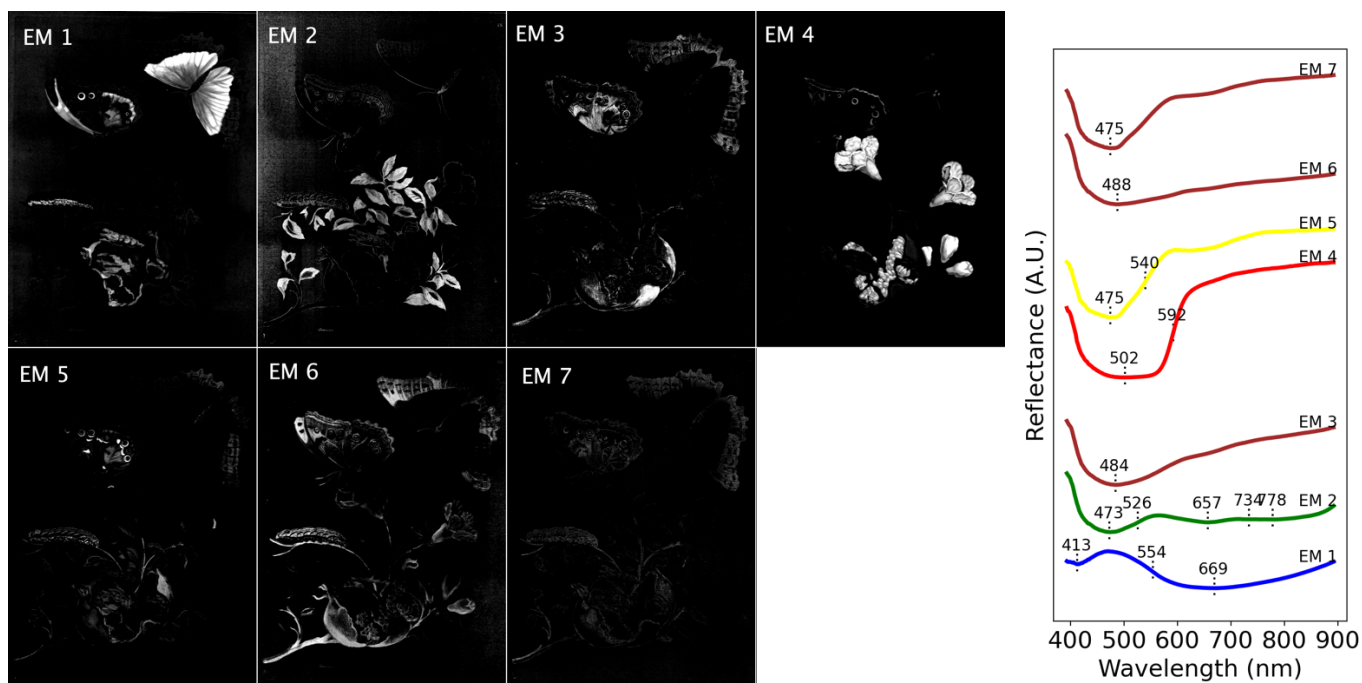

Figure S3. Endmember maps resulting from hyperspectral imaging for plate 9 (left) and associated reflectance spectra (right). Inflection points and local absorption maxima have been annotated in reflectance spectra.

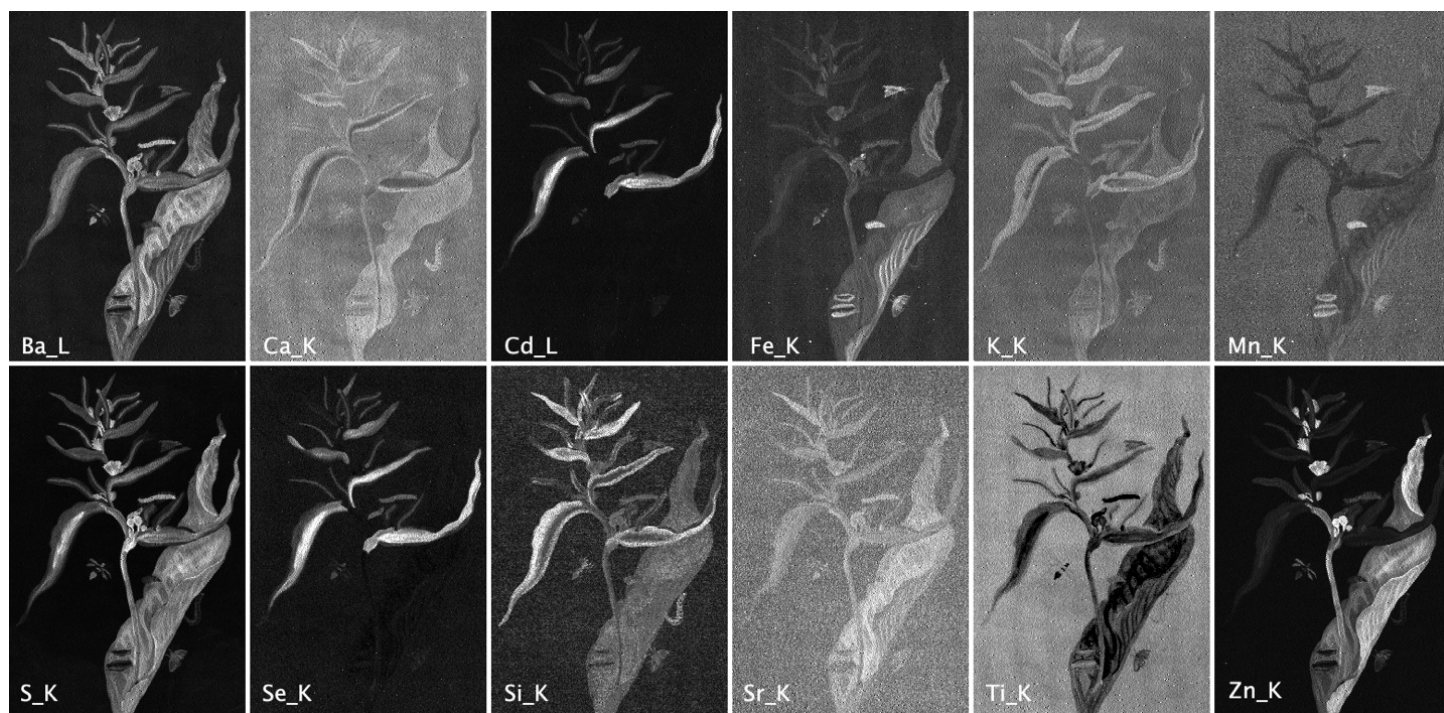

Figure S4. Elemental maps resulting from MA-XRF scan of plate 54.

Table S3. Results of XRF point analysis for plate 54. Elements marked with an asterisk are found in the mat. Those in italics are found in the paper. Data was corrupted for spot 1 and spot 2 so they are not included here. Elemental distributions suggest the use of Prussian blue, brown umber, lithopone, and cadmium-based yellow.

| Point | Color       | Elements Present                                                           | Pigment identification                                                                                                |
|-------|-------------|----------------------------------------------------------------------------|-----------------------------------------------------------------------------------------------------------------------|
| 03    | Green-Blue  | <i>Ca, Fe, K, As, Co, Cu, Mn, Ni, Si, Ti, Zn, S, Ba</i>                    | Mat and/or paper<br>Unidentified organic pigment, lithopone (barium sulfate + zinc sulfide)                           |
| 04    | Light Green | <i>Ca*, K, As, Co, Cu, Si, Mn, Ni, Ti*</i><br><i>Zn, Fe, S, Ba</i>         | Mat and/or paper<br>Prussian blue and/or iron oxide, lithopone (barium sulfate + zinc sulfide)                        |
| 05    | Dark Green  | <i>K, As, Co, Cu, Si, Mn, Ni, Ca*, Ti*</i><br><i>Zn, S, Fe, Ba</i>         | Mat and/or paper<br>Prussian blue and/or iron oxide, lithopone (barium sulfate + zinc sulfide)                        |
| 06    | Brown       | <i>Ti*, K, As, Cu, Si, Co, Ni, Ca*</i><br><i>Fe, Mn, Zn, S, Ba</i>         | Mat and/or paper<br>Iron oxide and/or umber (iron oxide + manganese oxide), lithopone (barium sulfate + zinc sulfide) |
| 07    | Pink        | <i>Ti*, Ca*, Fe*, Ba, K, Si, As, Co, Mn, Cu, Ni, S, Zn</i>                 | Mat and/or paper<br>Unidentified organic pigment, zinc white or lithopone (barium sulfate + zinc sulfide)             |
| 08    | Yellow      | <i>Ca*, K, As, Co, Mn, Cu, Sr, Ni, Si, Ti*</i><br><i>Zn, S, Fe, Cd, Ba</i> | Mat and/or paper<br>Cadmium-based pigment, lithopone (barium sulfate + zinc sulfide)                                  |
| 09    | Paper       | <i>Ca, Ti, K, As, Fe, Co, S, Si, Mn, Cu, Ni</i>                            |                                                                                                                       |
| 10    | Mat         | <i>Ca*, Ti*, Fe*</i>                                                       |                                                                                                                       |

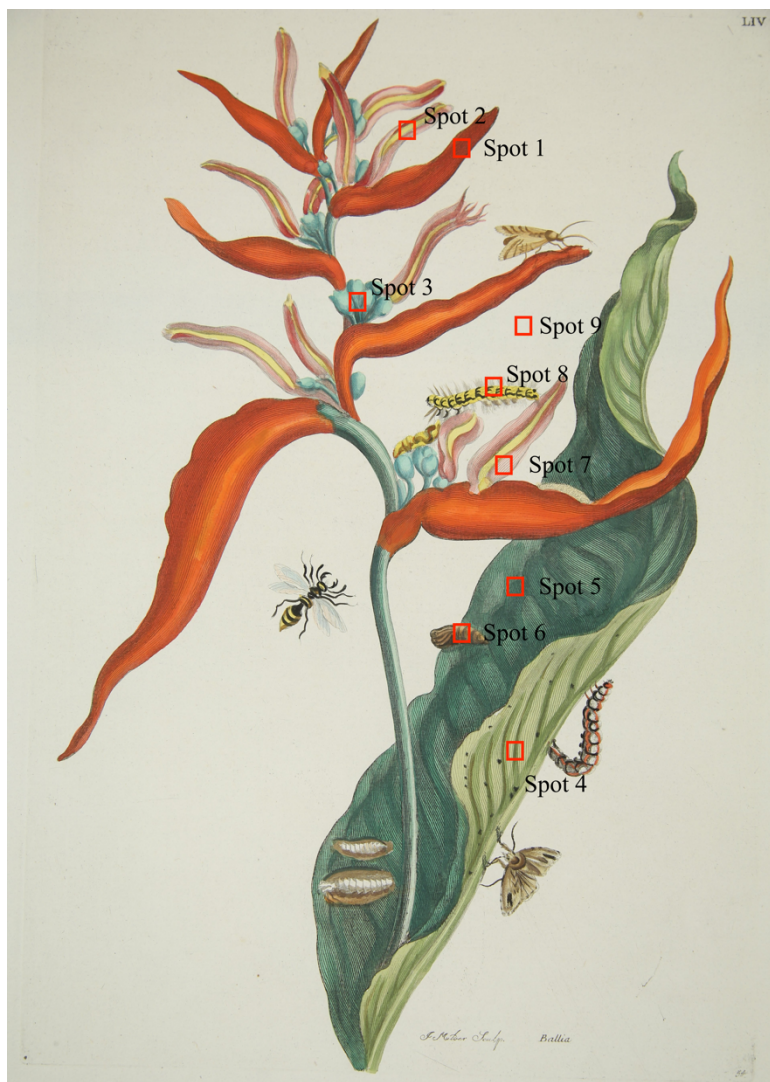

Figure S5 Sample locations for XRF point analysis of plate 54. An additional point was measured outside the frame on the print's mat.

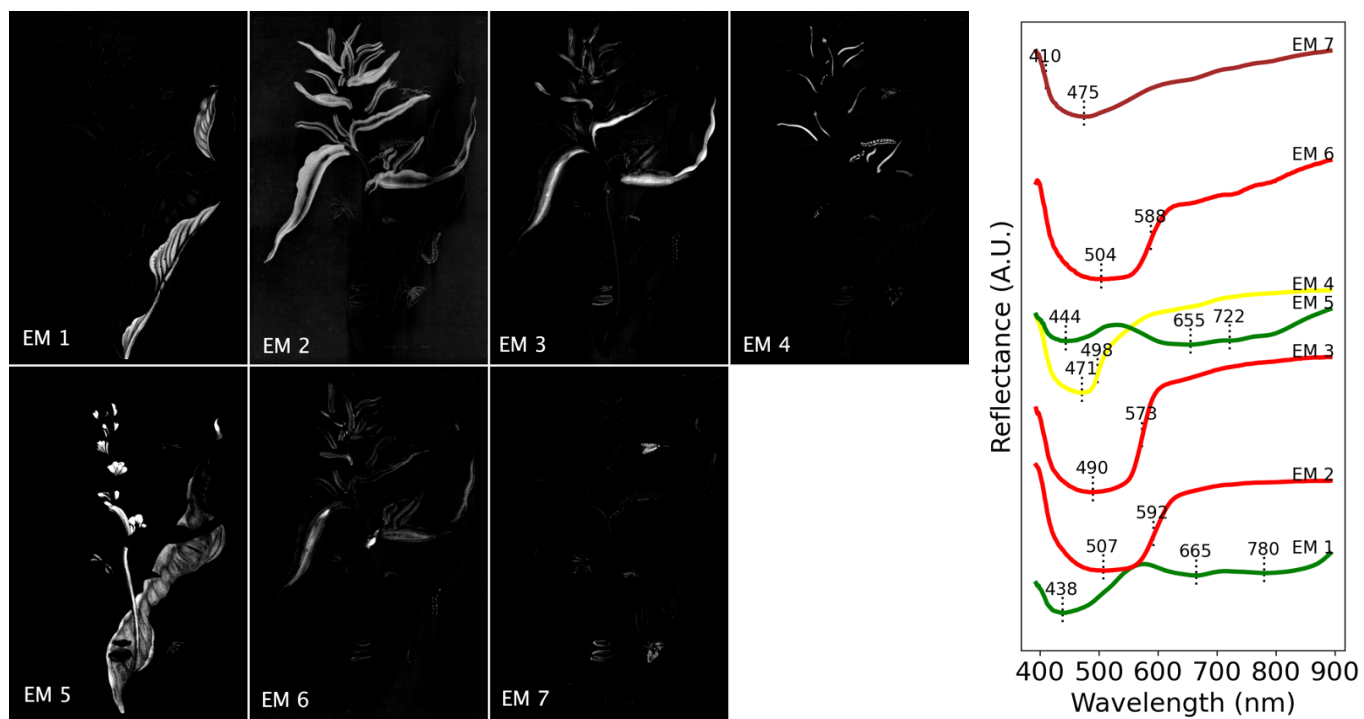

Figure S6. Endmember maps resulting from hyperspectral imaging for plate 54 (left) and associated reflectance spectra (right). Inflection points and local absorption maxima have been annotated in reflectance spectra.

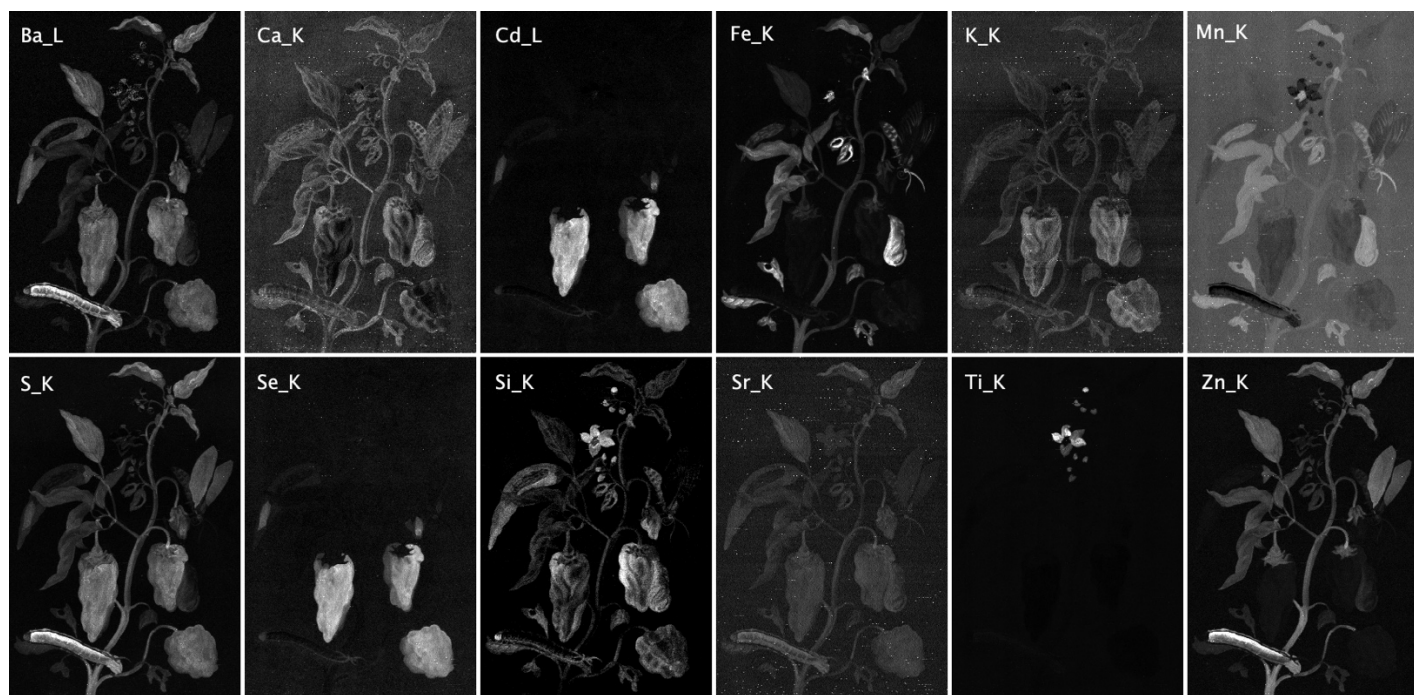

Figure S7. Elemental maps resulting from MA-XRF scan of plate 55.

Table S4. Results of XRF point analysis for plate 55. . Elements marked with an asterisk are found in the mat. Those in italics are found in the paper. Elemental distributions suggest the use of cadmium red, lithopone, cadmium-based yellow, and brown umber.

| Point | Color        | Elements Present                                                    | Pigment identification                                                                                                                    |
|-------|--------------|---------------------------------------------------------------------|-------------------------------------------------------------------------------------------------------------------------------------------|
| 01    | Dark green   | Ca*<br><i>Cu, Mn, As, K</i><br>Fe, Zn, Ba, S, Si                    | Mat<br>Paper<br>Prussian blue + iron oxide?<br>Organic pigments with lithopone substrate in mixture with Prussian blue and/or iron oxide? |
| 02    | Light blue   | Ca*, Fe*<br><i>K, As, Cu, K, Mn</i><br>Ti, Zn, Si, S                | Mat<br>Paper<br>Organic pigment?                                                                                                          |
| 03    | Yellow-green | Ca*, Ti*, P*,<br><i>K, Cu, As</i><br>Fe, Zn, S, Si, Mn, Ba          | Mat<br>Paper<br>Prussian blue + iron oxide?<br>Organic pigments with lithopone substrate in mixture with Prussian blue and/or iron oxide? |
| 04    | Red          | Ca*, Ti*, P*, Fe*<br><i>Mn, Cu, As</i><br>Cd, Ba, Se, S, Si, Zn (?) | Mat<br>Paper<br>Cadmium red, Organic red on a barium sulfate substrate                                                                    |
| 05    | Brown        | Ca*, Ti*, P*<br><i>K, Cu, As</i><br>Fe, Mn, Ba, Zn, S, Si           | Mat<br>Paper<br>Iron oxide, umber-type                                                                                                    |
| 06    | Light green  | Ca*, Ti*, P*,<br><i>K, Cu, As, Mn</i><br>Fe, Zn, S, Ba              | Mat<br>Paper<br>Prussian blue + iron oxide?, Organic pigments with lithopone substrate in mixture with Prussian blue and/or iron oxide?   |
| 07    | White        | Ca*, P*, Fe*<br><i>K, Cu, As, Mn</i><br>Ti, Si                      | Mat<br>Paper<br>Titanium white                                                                                                            |
| 08    | Yellow       | Ca*, Ti*, P*<br><i>K, Cu, As, Mn, S</i><br>Fe                       | Mat<br>Paper<br>Iron oxide                                                                                                                |
| 09    | Black        | Ca*, Fe*<br><i>K, As, Cu, K, Mn</i><br>Zn, S, Si, Ba, Fe            | Mat<br>Paper<br>Unknown black                                                                                                             |
| 10    | Light green  | Ca*, Fe*, P*<br><i>K, Mn, Cu, As</i><br>S, Ba, Zn,                  | Mat<br>Paper<br>Organic pigments with lithopone substrate?                                                                                |
| 11    | Paper        | (Ca*), (Ti*), (Fe*), (P*)<br><i>S, K, Cu, As, Mn</i>                | Mat<br>Paper                                                                                                                              |
| 12    | Mat          | Ca*, Ti*, Fe*, P*                                                   | Mat                                                                                                                                       |
| 13    | Dark red     | Ca*, Ti*, P*, Fe*<br><i>Mn, Cu, As</i>                              | Mat<br>Paper                                                                                                                              |



|    |            |                                                  |                                                                                                                                              |
|----|------------|--------------------------------------------------|----------------------------------------------------------------------------------------------------------------------------------------------|
|    |            | Cd, S, Se<br>Si, P, K, Ba,                       | Cadmium red<br>Organic red?                                                                                                                  |
| 14 | Dark red   | Ca*, Ti*, P*, Fe*<br>Mn, Cu, As<br>Si, P, K, Ba, | Mat<br>Paper<br>Organic red?                                                                                                                 |
| 15 | Dark green | Ca*, P*<br>Cu, As, K<br>Fe, Zn, S, Si, Mn        | Mat<br>Paper<br>Prussian blue + iron oxide?<br>Organic pigments with lithopone substrate in mixture with<br>Prussian blue and/or iron oxide? |

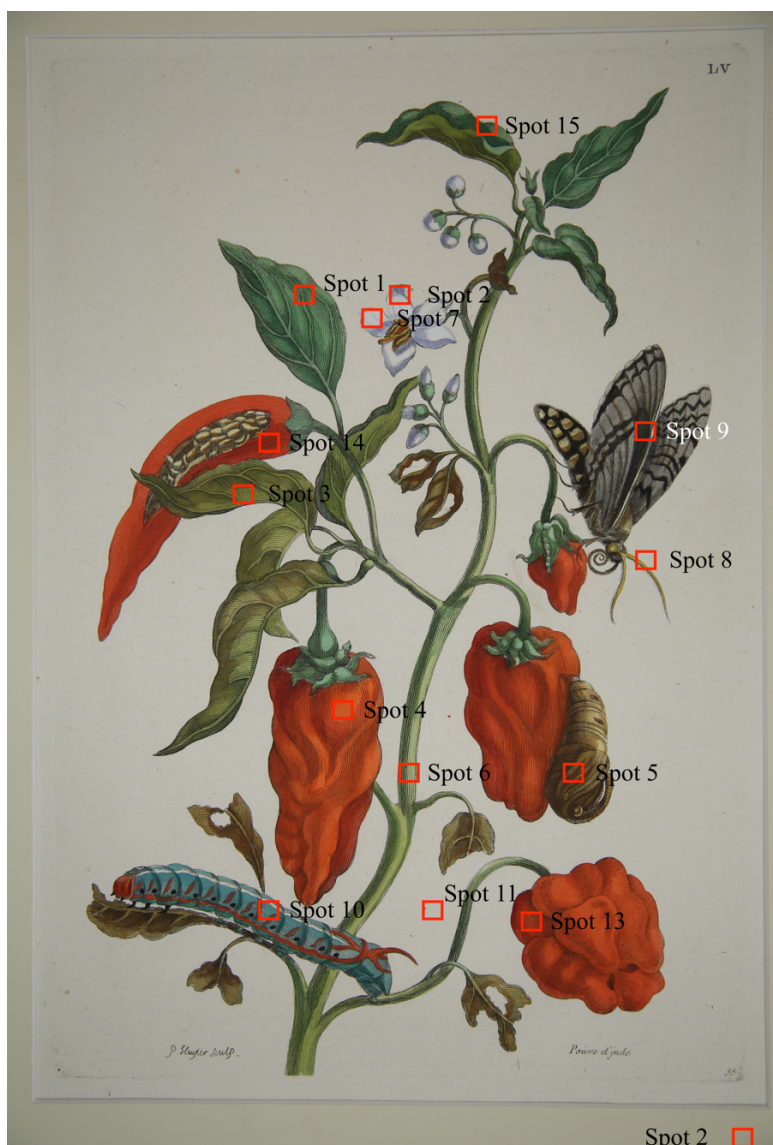

Figure S8. Sample locations for XRF point analysis of plate 55.



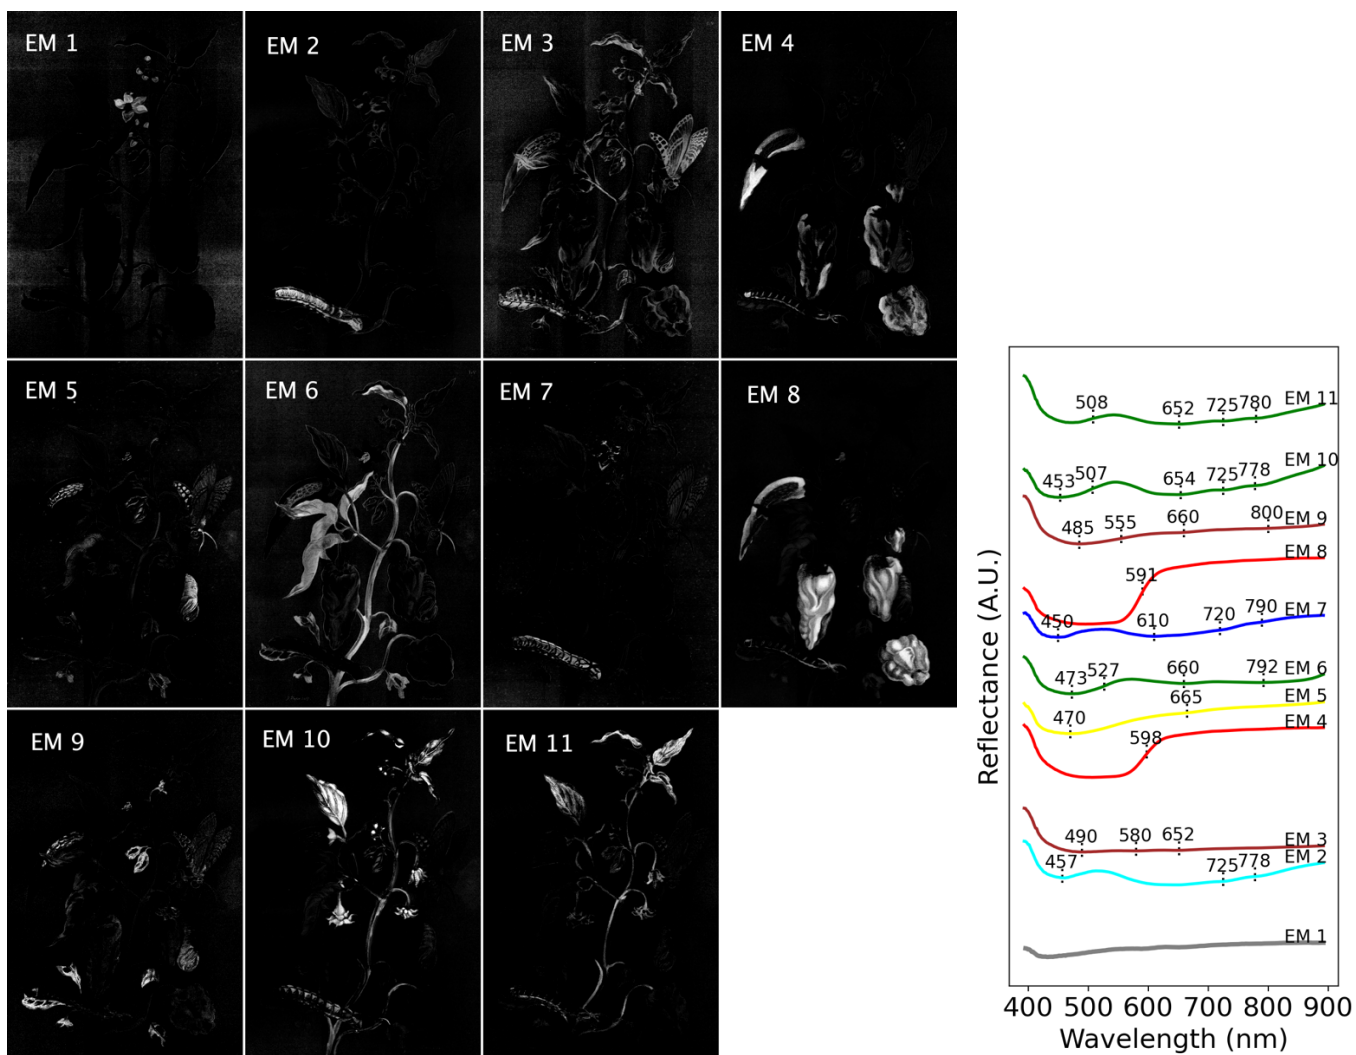

Figure S9. Endmember maps resulting from hyperspectral imaging for plate 55 (left) and associated reflectance spectra (right). Inflection points and local absorption maxima have been annotated in reflectance spectra.
